# Supplementary material for: Single molecule magnet behavior and luminescence of {Ln4} and {LnZn} complexes
Source: Royal Society of Chemistry journal article supplement (doi:10.1039/d2dt01365g), 2022-01-01
Supplement: d2dt01365g1.pdf [file d2dt01365g1.pdf]

Supporting information for  
**Single molecule magnet behavior and luminescence of {Ln<sub>4</sub>} and  
{LnZn} complexes**

Guo Peng,<sup>a\*</sup> Qi Yang,<sup>a</sup> Yue Chen,<sup>a</sup> Xiang-Tao Dong,<sup>a</sup> Zaichao Zhang<sup>b</sup> and Xiao-  
Ming Ren<sup>a\*</sup>

<sup>a</sup>State Key Laboratory of Materials-Oriented Chemical Engineering, School of  
Chemistry and Molecular Engineering, Nanjing Tech University, Nanjing 211816, P.

R. China

E-mail: guopeng@njtech.edu.cn, xmren@njtech.edu.cn

<sup>b</sup> Jiangsu Key Laboratory for the Chemistry of Low-Dimensional Materials, School of  
Chemistry and Chemical Engineering, Huaiyin Normal University, Huai'an 223300,

China

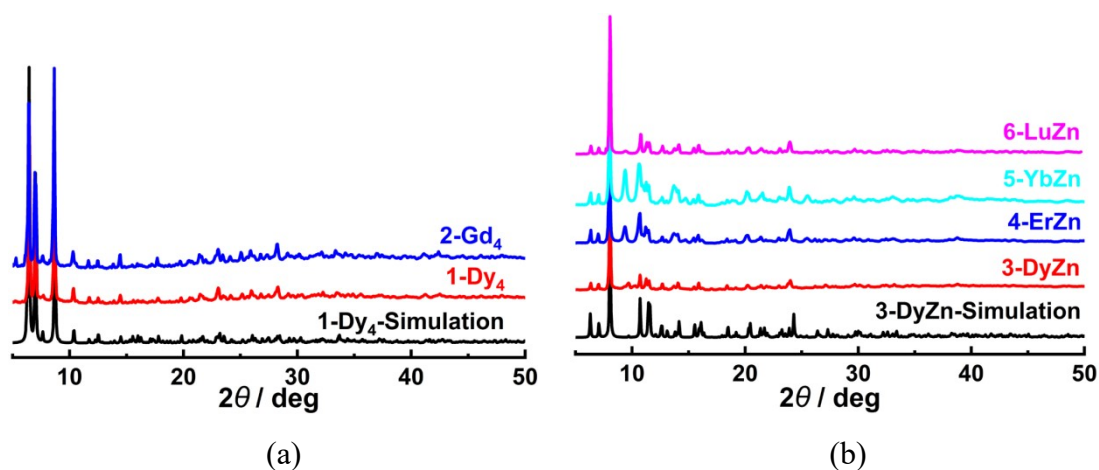

**Fig. S1** Measured and simulated PXRD patterns of complexes 1-6.

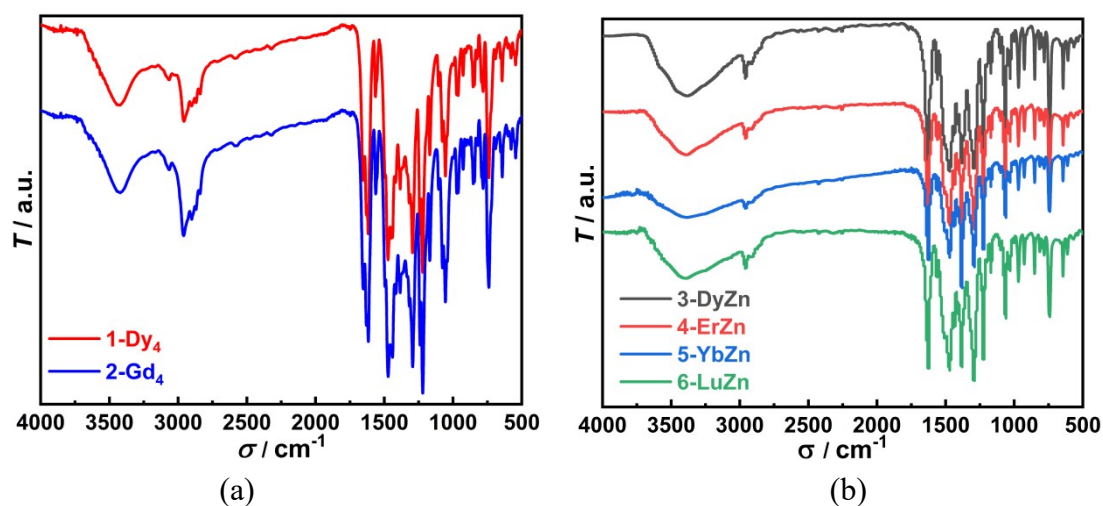

**Fig. S2** IR spectra of complexes **1-6**.

**Table S1.** Crystallographic data and structure refinement for ligand and complexes **1-**

**5.**

|                                             | Ligand                                                        | 1-Dy <sub>4</sub>                                                                | 2-Gd <sub>4</sub>                                                                |
|---------------------------------------------|---------------------------------------------------------------|----------------------------------------------------------------------------------|----------------------------------------------------------------------------------|
| Formula                                     | C <sub>21</sub> H <sub>26</sub> N <sub>2</sub> O <sub>4</sub> | C <sub>90</sub> H <sub>119</sub> Dy <sub>4</sub> N <sub>15</sub> O <sub>35</sub> | C <sub>92</sub> H <sub>122</sub> Gd <sub>4</sub> N <sub>16</sub> O <sub>35</sub> |
| <i>M<sub>r</sub></i> (g mol <sup>-1</sup> ) | 370.44                                                        | 2620.99                                                                          | 2641.04                                                                          |
| Crystal system                              | Triclinic                                                     | Monoclinic                                                                       | Monoclinic                                                                       |
| Space group                                 | <i>P</i> -1                                                   | <i>C</i> 2/ <i>c</i>                                                             | <i>C</i> 2/ <i>c</i>                                                             |
| <i>T</i> (K)                                | 173(2)                                                        | 173(2)                                                                           | 173(2)                                                                           |
| <i>a</i> (Å)                                | 13.0277(4)                                                    | 30.2530(9)                                                                       | 30.398(4)                                                                        |
| <i>b</i> (Å)                                | 13.5623(4)                                                    | 17.0358(4)                                                                       | 17.011(2)                                                                        |
| <i>c</i> (Å)                                | 13.8395(5)                                                    | 24.1031(6)                                                                       | 24.192(5)                                                                        |
| $\alpha$ (°)                                | 108.0940(10)                                                  | 90                                                                               | 90                                                                               |
| $\beta$ (°)                                 | 107.9440(10)                                                  | 123.388(3)                                                                       | 123.5970(10)                                                                     |
| $\gamma$ (°)                                | 110.0100(10)                                                  | 90                                                                               | 90                                                                               |
| <i>V</i> (Å <sup>3</sup> )                  | 1934.75(11)                                                   | 10372.2(6)                                                                       | 10419(3)                                                                         |
| <i>Z</i>                                    | 4                                                             | 4                                                                                | 4                                                                                |
| <i>D<sub>c</sub></i> (g cm <sup>-3</sup> )  | 1.272                                                         | 1.678                                                                            | 1.684                                                                            |
| $\mu$ (mm <sup>-1</sup> )                   | 0.088                                                         | 2.916                                                                            | 2.584                                                                            |
| <i>F</i> (000)                              | 792                                                           | 4644                                                                             | 4612                                                                             |
| Reflns collected                            | 16380                                                         | 46944                                                                            | 22275                                                                            |
| Unique reflns                               | 7053                                                          | 11209                                                                            | 9393                                                                             |
| <i>R</i> <sub>int</sub>                     | 0.0378                                                        | 0.0298                                                                           | 0.0830                                                                           |
| GOF                                         | 0.989                                                         | 1.059                                                                            | 1.033                                                                            |

|                                               |                                                                |                                                                |                                                                |
|-----------------------------------------------|----------------------------------------------------------------|----------------------------------------------------------------|----------------------------------------------------------------|
| $R_1(I > 2\sigma)$                            | 0.0417                                                         | 0.0220                                                         | 0.0488                                                         |
| $wR_2$ (all data)                             | 0.1119                                                         | 0.0614                                                         | 0.0973                                                         |
| Max. diff. peak / hole (e $\text{\AA}^{-3}$ ) | 0.168/-0.215                                                   | 1.478/-0.852                                                   | 0.981/-0.950                                                   |
|                                               | 3-DyZn                                                         | 4-ErZn                                                         | 5-YbZn                                                         |
| Formula                                       | $\text{C}_{25}\text{H}_{32}\text{N}_7\text{O}_{14}\text{ZnDy}$ | $\text{C}_{25}\text{H}_{32}\text{N}_7\text{O}_{14}\text{ZnEr}$ | $\text{C}_{25}\text{H}_{32}\text{N}_7\text{O}_{14}\text{ZnYb}$ |
| $M_r$ (g mol $^{-1}$ )                        | 882.44                                                         | 887.20                                                         | 892.98                                                         |
| Crystal system                                | triclinic                                                      | triclinic                                                      | triclinic                                                      |
| Space group                                   | $P-1$                                                          | $P-1$                                                          | $P-1$                                                          |
| $T$ (K)                                       | 173(2)                                                         | 173(2)                                                         | 173(2)                                                         |
| $a$ ( $\text{\AA}$ )                          | 9.1667(4)                                                      | 9.1607(4)                                                      | 9.1368(5)                                                      |
| $b$ ( $\text{\AA}$ )                          | 13.0847(6)                                                     | 13.0748(7)                                                     | 13.0737(8)                                                     |
| $c$ ( $\text{\AA}$ )                          | 14.5952(6)                                                     | 14.5902(7)                                                     | 14.5753(8)                                                     |
| $\alpha$ ( $^\circ$ )                         | 73.713(2)                                                      | 73.561(2)                                                      | 73.361(2)                                                      |
| $\beta$ ( $^\circ$ )                          | 88.479(2)                                                      | 88.3920(10)                                                    | 88.269(2)                                                      |
| $\gamma$ ( $^\circ$ )                         | 84.283(2)                                                      | 84.147(2)                                                      | 84.129(2)                                                      |
| $V$ ( $\text{\AA}^3$ )                        | 1671.99(13)                                                    | 1667.36(14)                                                    | 1659.39(16)                                                    |
| $Z$                                           | 2                                                              | 2                                                              | 2                                                              |
| $D_c$ (g cm $^{-3}$ )                         | 1.753                                                          | 1.767                                                          | 1.787                                                          |
| $\mu$ (mm $^{-1}$ )                           | 3.010                                                          | 3.294                                                          | 3.599                                                          |
| $F(000)$                                      | 878                                                            | 882                                                            | 886                                                            |
| Reflns collected                              | 13497                                                          | 14035                                                          | 13843                                                          |
| Unique reflns                                 | 6013                                                           | 6056                                                           | 6013                                                           |
| $R_{\text{int}}$                              | 0.0389                                                         | 0.0445                                                         | 0.0376                                                         |
| GOF                                           | 1.064                                                          | 1.059                                                          | 1.050                                                          |
| $R_1(I > 2\sigma)$                            | 0.0305                                                         | 0.0345                                                         | 0.0307                                                         |
| $wR_2$ (all data)                             | 0.0539                                                         | 0.0621                                                         | 0.0533                                                         |
| Max. diff. peak / hole (e $\text{\AA}^{-3}$ ) | 0.669/-0.578                                                   | 1.069/-0.783                                                   | 1.111/-0.920                                                   |

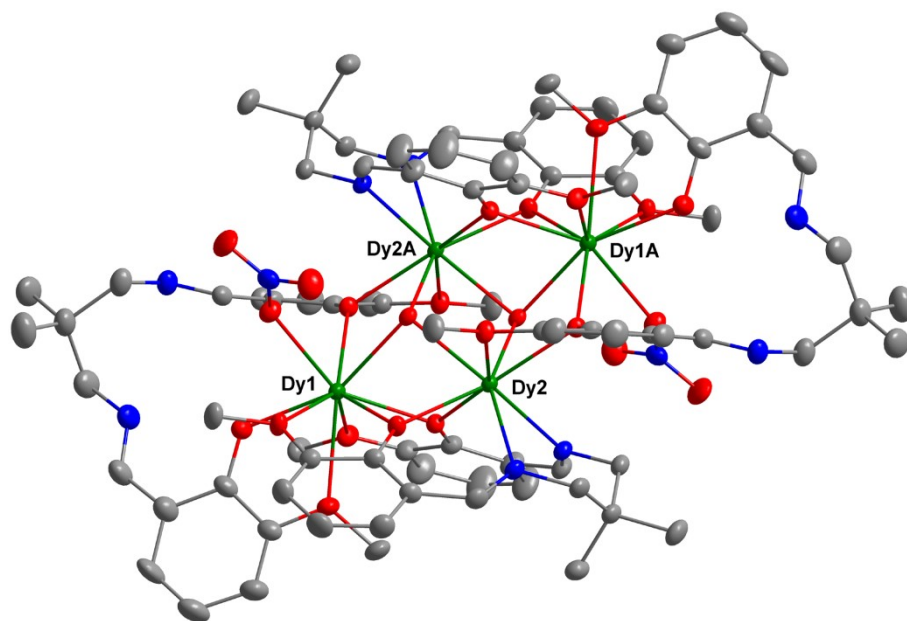

(a)

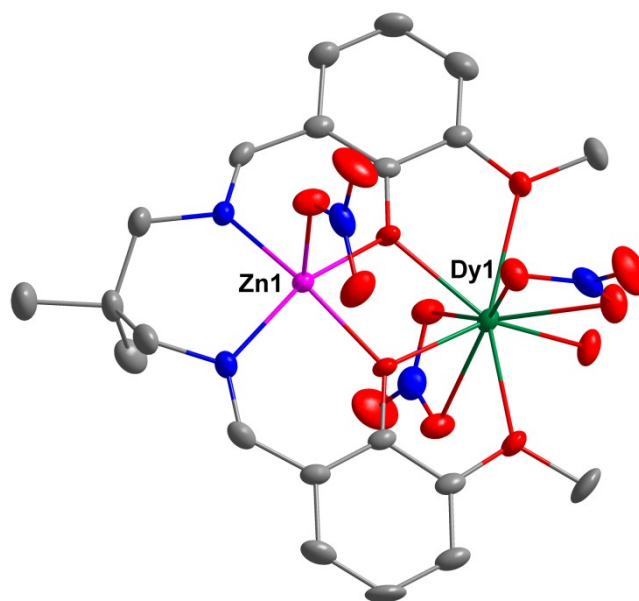

(b)

**Fig. S3** ORTEP views of complexes **1** (a) and **3** (b) with displacement ellipsoids drawn at the 50% probability level. Symmetry codes: A 1.5-x, 0.5-y, 1-z.

**Table S2.** Continuous shape measures (CShM) for complexes **1-Dy<sub>4</sub>** and **2-Gd<sub>4</sub>**.

|          | Dy1          | Gd1          |          | Dy2          | Gd2          |
|----------|--------------|--------------|----------|--------------|--------------|
| EP-9     | 35.756       | 35.766       | OP-8     | 31.365       | 31.689       |
| OPY-9    | 22.105       | 22.247       | HPY-8    | 20.569       | 20.377       |
| HBPY-9   | 17.117       | 17.027       | HBPY-8   | 14.899       | 14.629       |
| JTC-9    | 16.389       | 16.501       | CU-8     | 8.479        | 8.296        |
| JCCU-9   | 10.021       | 9.873        | SAPR-8   | <b>1.292</b> | <b>1.341</b> |
| CCU-9    | 8.640        | 8.461        | TDD-8    | 2.271        | 2.316        |
| JCSAPR-9 | 1.862        | 1.944        | JGBF-8   | 15.349       | 15.383       |
| CSAPR-9  | <b>1.206</b> | <b>1.251</b> | JETBPY-8 | 26.478       | 26.492       |
| JTCTPR-9 | 3.561        | 3.585        | JBTPR-8  | 3.471        | 3.595        |
| TCTPR-9  | 1.517        | 1.531        | BTPR-8   | 2.986        | 3.094        |
| JTDIC-9  | 12.655       | 12.708       | JSD-8    | 5.443        | 5.549        |
| HH-9     | 10.993       | 10.718       | TT-8     | 9.192        | 9.001        |
| MFF-9    | <b>1.225</b> | <b>1.261</b> | ETBPY-8  | 22.465       | 22.542       |

EP-9=Enneagon, OPY-9=Octagonal pyramid, HBPY-9=Heptagonal bipyramid, HBPY-9=Heptagonal bipyramid, JCCU-9=Capped cube J8, CCU-9=Spherical-relaxed capped cube, JCSAPR-9=Capped square antiprism J10, CSAPR-9=Spherical capped square antiprism, JTCTPR-9=Tricapped trigonal prism J51, TCTPR-9=Spherical tricapped trigonal prism, JTDIC-9=Tridiminished icosahedron J63, HH-9=Hula-hoop, MFF-9=Muffin; OP-8=Octagon, HPY-8=Heptagonal pyramid, HBPY-8=Hexagonal bipyramid, CU-8=Cube, SAPR-8=Square antiprism, TDD-8=Triangular dodecahedron, JGBF-8=Johnson gyrobifastigium J26, JETBPY-8=Johnson elongated triangular bipyramid J14, JBTPR-8=Biaugmented trigonal prism J50, BTPR-8=Biaugmented trigonal prism, JSD-8=Snub diphenoid J84, TT-8=Triakis tetrahedron, ETBPY-8=Elongated trigonal bipyramid

**Table S3.** Continuous shape measures (CShM) for complexes **3-DyZn**, **4-ErZn** and **5-YbZn**.

|       | Zn     |        |        | Ln    |        |        |        |
|-------|--------|--------|--------|-------|--------|--------|--------|
|       | 3-DyZn | 4-ErZn | 5-YbZn |       | 3-DyZn | 4-ErZn | 5-YbZn |
| PP-5  | 26.834 | 26.853 | 26.817 | EP-9  | 36.049 | 36.072 | 36.055 |
| vOC-5 | 3.027  | 3.041  | 3.088  | OPY-9 | 21.943 | 22.047 | 22.029 |

|         |              |              |              |          |              |              |              |
|---------|--------------|--------------|--------------|----------|--------------|--------------|--------------|
| TBPY-5  | 5.202        | 5.265        | 5.328        | HBPY-9   | 16.200       | 16.354       | 16.462       |
| SPY-5   | <b>1.636</b> | <b>1.634</b> | <b>1.629</b> | JTC-9    | 14.471       | 14.706       | 14.876       |
| JTBPY-5 | 7.926        | 8.039        | 8.088        | JCCU-9   | 10.438       | 10.522       | 10.715       |
|         |              |              |              | CCU-9    | 8.458        | 8.551        | 8.716        |
|         |              |              |              | JCSAPR-9 | 2.968        | 2.828        | 2.724        |
|         |              |              |              | CSAPR-9  | <b>1.776</b> | <b>1.634</b> | <b>1.530</b> |
|         |              |              |              | JTCTPR-9 | 4.242        | 4.199        | 4.151        |
|         |              |              |              | TCTPR-9  | 2.530        | 2.457        | 2.418        |
|         |              |              |              | JTDIC-9  | 10.192       | 10.381       | 10.560       |
|         |              |              |              | HH-9     | 10.876       | 11.034       | 11.026       |
|         |              |              |              | MFF-9    | <b>1.923</b> | <b>1.800</b> | <b>1.722</b> |

PP-5 = Pentagon, vOC-5 = Vacant octahedron, TBPY-5 = Trigonal bipyramid, SPY-5 = Spherical square pyramid, JTBPY-5 = Johnson trigonal bipyramid J12; EP-9=Enneagon, OPY-9=Octagonal pyramid, HBPY-9=Heptagonal bipyramid, HBPY-9=Heptagonal bipyramid, JCCU-9=Capped cube J8, CCU-9=Spherical-relaxed capped cube, JCSAPR-9=Capped square antiprism J10, CSAPR-9=Spherical capped square antiprism, JTCTPR-9=Tricapped trigonal prism J51, TCTPR-9=Spherical tricapped trigonal prism, JTDIC-9=Tridiminished icosahedron J63, HH-9=Hula-hoop, MFF-9=Muffin

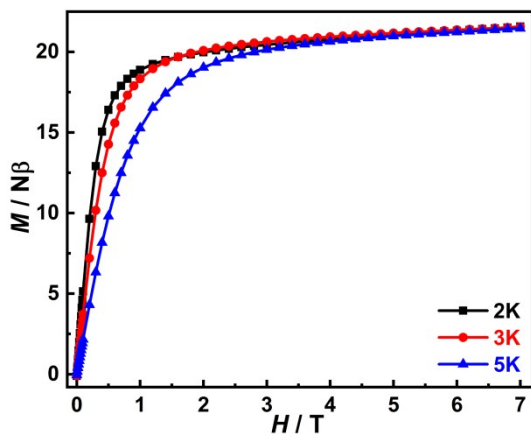

(a)

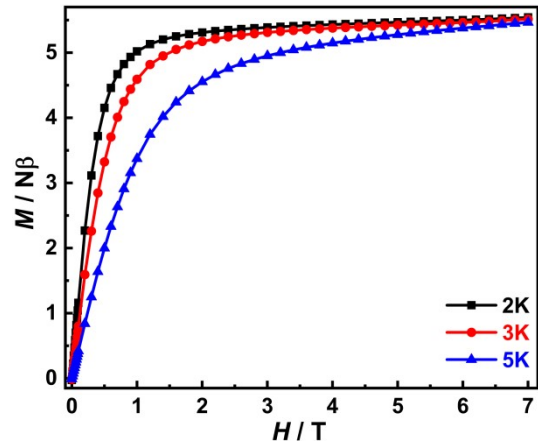

(b)

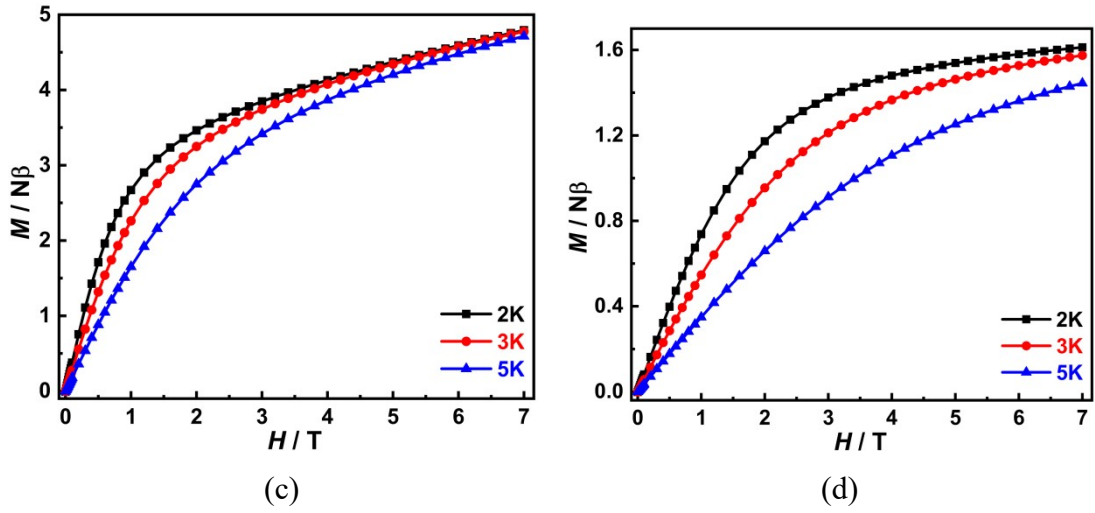

Fig. S4  $M$  vs.  $H$  curves for 1 (a) and 3-5 (b-d).

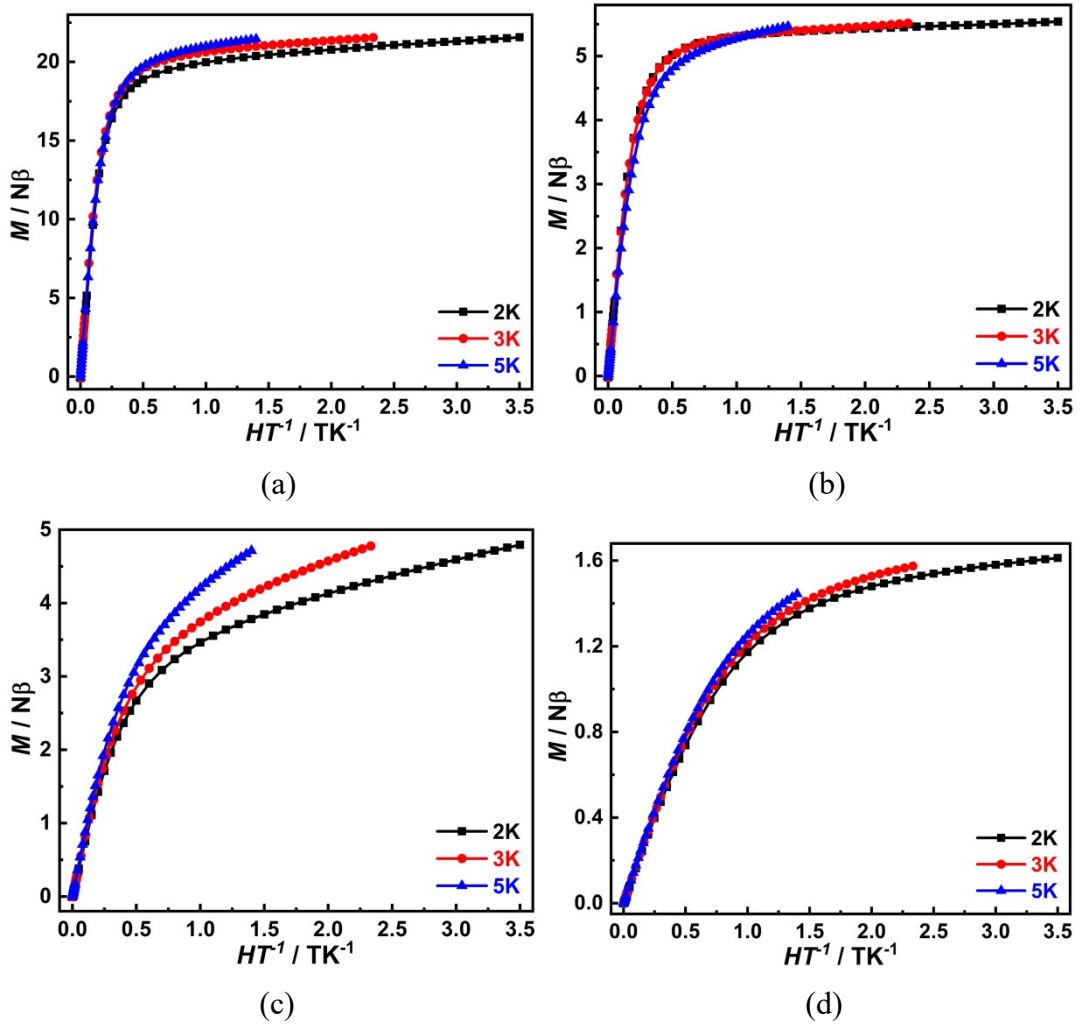

Fig. S5  $M$  vs.  $HT^{-1}$  curves for 1 (a) and 3-5 (b-d).

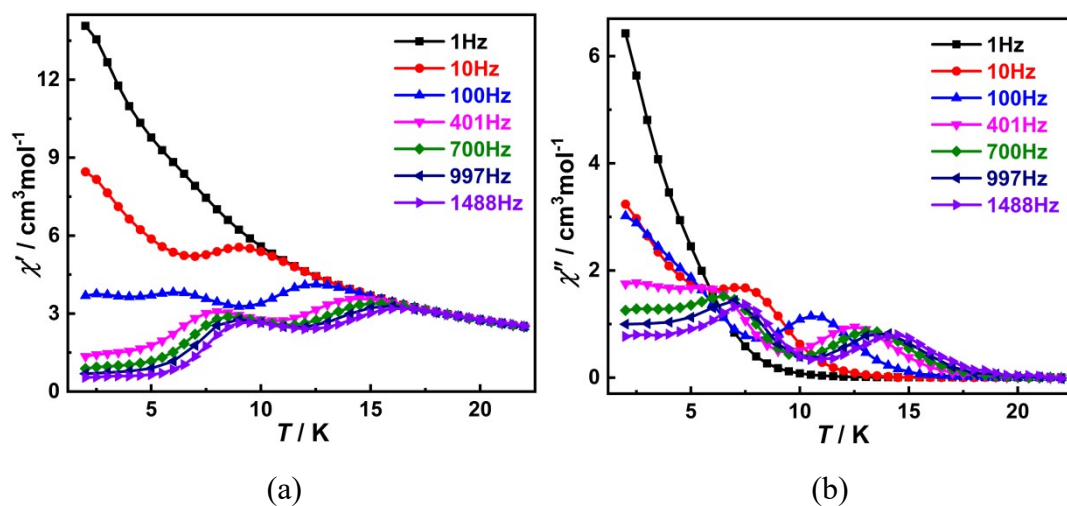

**Fig. S6** Temperature dependence of in-phase (a) and out-of-phase (b) ac susceptibility under a zero dc field for **1**.

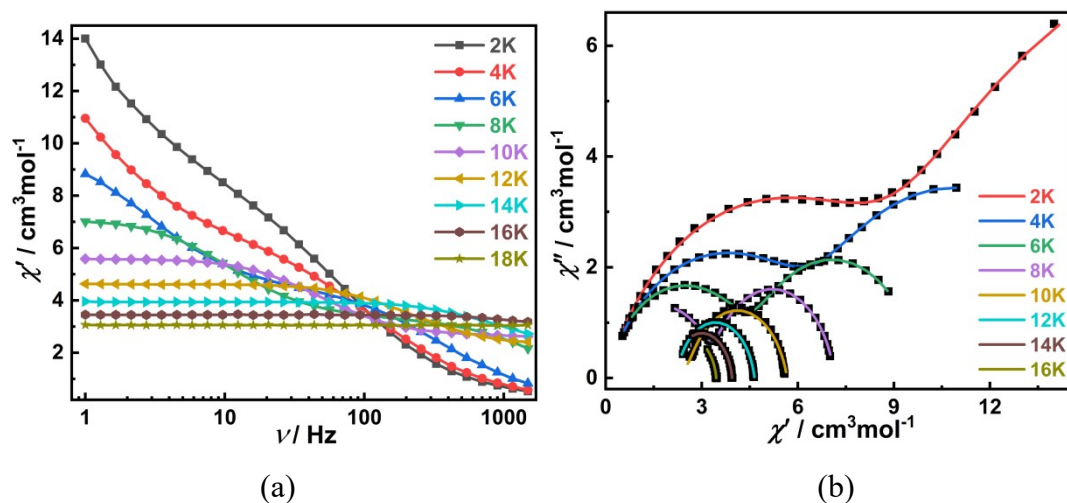

**Fig. S7** Frequency dependence of in-phase (a) ac susceptibility under a zero dc field and Cole-Cole plots (b) for **1**.



**Table S4.** Cole-Cole parameters of **1** at a zero dc field

| T / K | $\chi_s / \text{cm}^3 \cdot \text{mol}^{-1}$ | $\Delta\chi_1 / \text{cm}^3 \cdot \text{mol}^{-1}$ | $\tau_1 / \text{s}$ | $\alpha_1$ | $\Delta\chi_2 / \text{cm}^3 \cdot \text{mol}^{-1}$ | $\tau_2 / \text{s}$ | $\alpha_2$ | R        |
|-------|----------------------------------------------|----------------------------------------------------|---------------------|------------|----------------------------------------------------|---------------------|------------|----------|
| 2     | 1.38E-08                                     | 9.08E+00                                           | 2.53E-03            | 2.96E-01   | 2.18E+01                                           | 4.50E-01            | 2.43E-01   | 1.27E-01 |
| 4     | 2.23E-08                                     | 6.60E+00                                           | 1.37E-03            | 2.94E-01   | 9.19E+00                                           | 1.69E-01            | 2.19E-01   | 8.43E-03 |
| 6     | 6.30E-08                                     | 4.60E+00                                           | 4.32E-04            | 2.34E-01   | 5.27E+00                                           | 5.54E-02            | 1.62E-01   | 9.28E-03 |
| 8     | 2.99E-07                                     | 3.36E+00                                           | 6.82E-05            | 1.76E-01   | 3.78E+00                                           | 1.43E-02            | 1.18E-01   | 7.07E-03 |
| 10    | 4.63E-14                                     | 2.73E+00                                           | 8.03E-08            | 6.73E-01   | 2.95E+00                                           | 3.22E-03            | 1.39E-01   | 1.04E-01 |
| 12    | 4.00E-15                                     | 2.21E+00                                           | 3.19E-07            | 8.86E-07   | 2.43E+00                                           | 6.91E-04            | 1.22E-01   | 1.38E-02 |
| 14    | 3.80E-22                                     | 2.11E+00                                           | 1.31E-06            | 3.57E-06   | 1.84E+00                                           | 1.69E-04            | 9.20E-02   | 3.86E-03 |
| 16    | 2.83E-30                                     | 2.11E+00                                           | 3.03E-06            | 6.46E-06   | 1.34E+00                                           | 4.69E-05            | 9.22E-02   | 3.20E-03 |

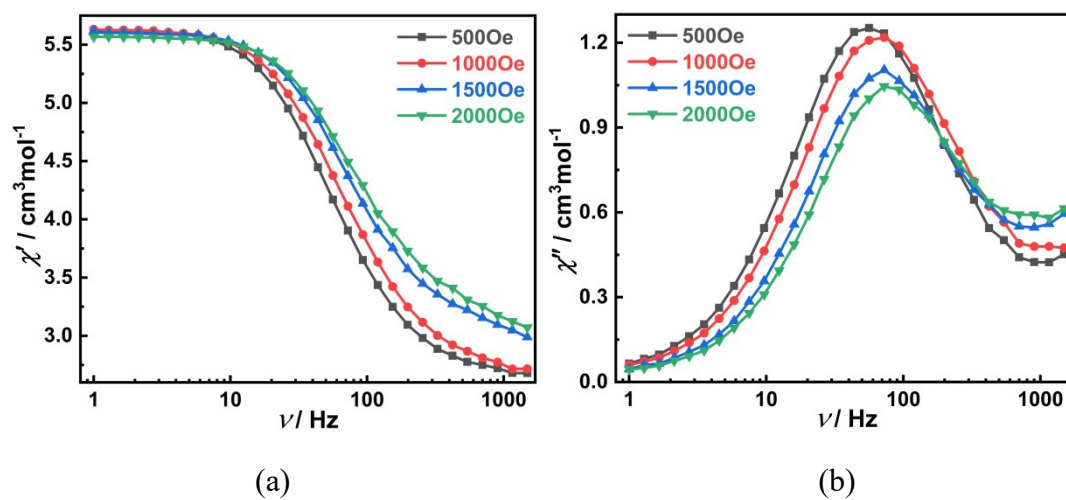**Fig. S8** Frequency dependence of in-phase (a) and out-of-phase (b) ac susceptibility under various dc fields at 10 K for **1**.

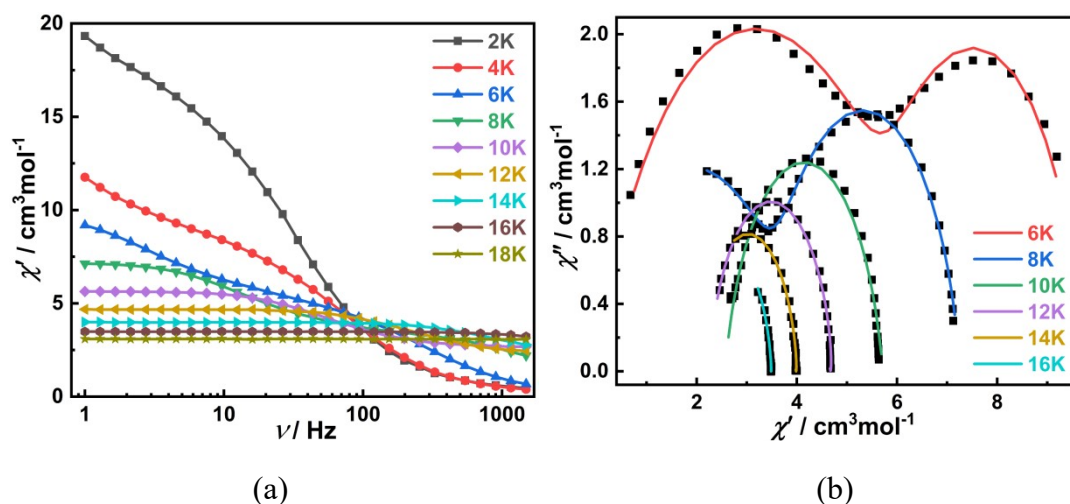

**Fig. S9** Frequency dependence of in-phase (a) ac susceptibility under a 500Oe dc field and Cole-Cole plots (b) for **1**.

**Table S5.** Cole-Cole parameters of **1** at a 500Oe dc field.

| T / K | $\chi_S / \text{cm}^3 \cdot \text{mol}^{-1}$ | $\Delta\chi_1 / \text{cm}^3 \cdot \text{mol}^{-1}$ | $\tau_1 / \text{s}$ | $\alpha_1$ | $\Delta\chi_2 / \text{cm}^3 \cdot \text{mol}^{-1}$ | $\tau_2 / \text{s}$ | $\alpha_2$ | $R$      |
|-------|----------------------------------------------|----------------------------------------------------|---------------------|------------|----------------------------------------------------|---------------------|------------|----------|
| 6     | 4.04E-14                                     | 6.07<br>E+00                                       | 7.52E-04            | 2.68E-01   | 3.60<br>E+00                                       | 5.15E-02            | 4.85E-02   | 2.19E-01 |
| 8     | 1.09E-13                                     | 3.68<br>E+00                                       | 7.29E-05            | 2.84E-01   | 3.58<br>E+00                                       | 1.08E-02            | 1.30E-01   | 3.18E-02 |
| 10    | 3.13E-13                                     | 4.26<br>E+00                                       | 3.54E-21            | 9.89E-01   | 3.04<br>E+00                                       | 2.60E-03            | 1.38E-01   | 1.79E-01 |
| 12    | 4.43E-13                                     | 6.82<br>E+00                                       | 1.05E-21            | 1.02E+00   | 2.67<br>E+00                                       | 6.76E-04            | 1.51E-01   | 1.32E-02 |
| 14    | 2.05E-12                                     | 4.72<br>E+00                                       | 3.98E-21            | 1.01E+00   | 2.03<br>E+00                                       | 1.58E-04            | 1.26E-01   | 4.99E-03 |
| 16    | 4.96E-12                                     | 3.75<br>E+00                                       | 9.01E-21            | 1.00E+00   | 1.71<br>E+00                                       | 3.54E-05            | 1.11E-01   | 1.92E-03 |

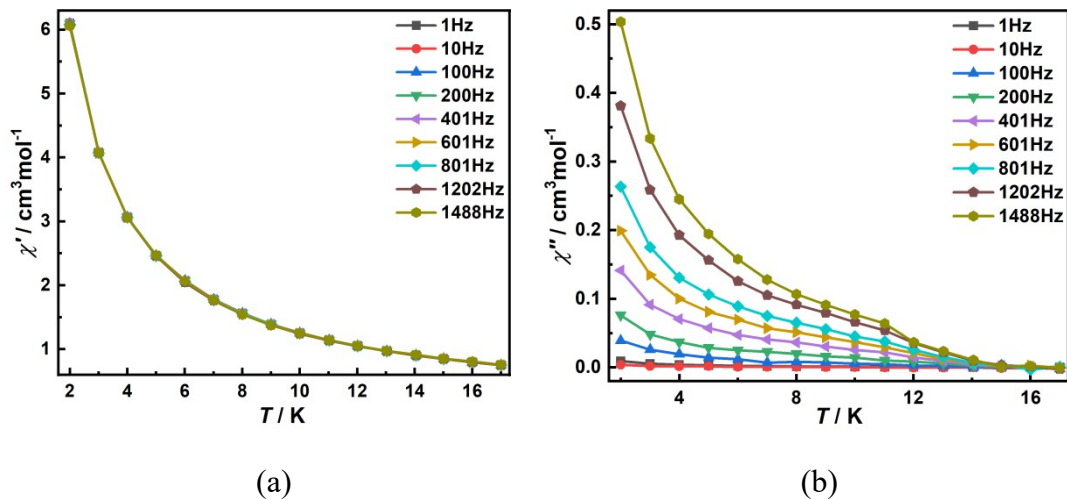

**Fig. S10** Temperature dependence of in-phase (a) and out-of-phase (b) ac susceptibility at a zero dc field for **3**.

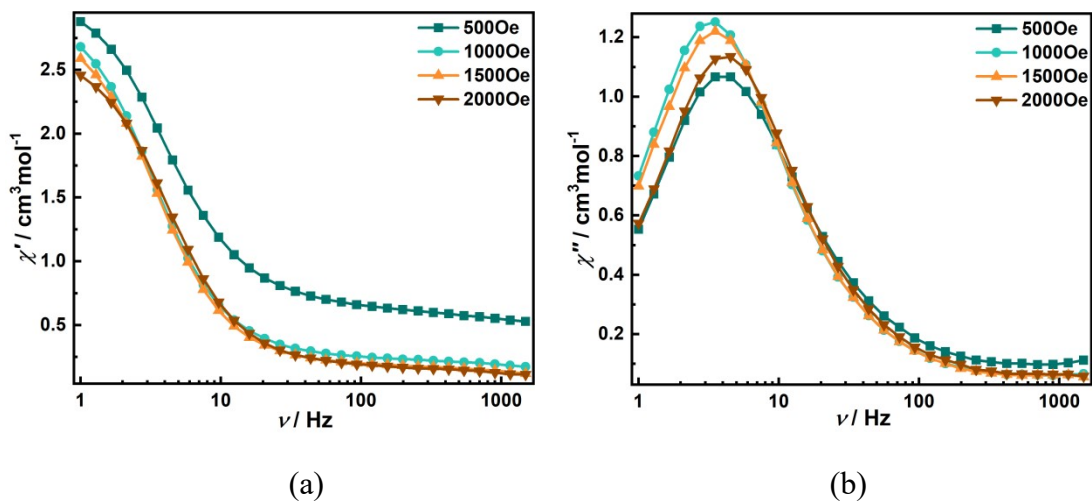

**Fig. S11** Frequency dependence of in-phase (a) and out-of-phase (b) ac susceptibility under various dc fields at 4 K for **3**.

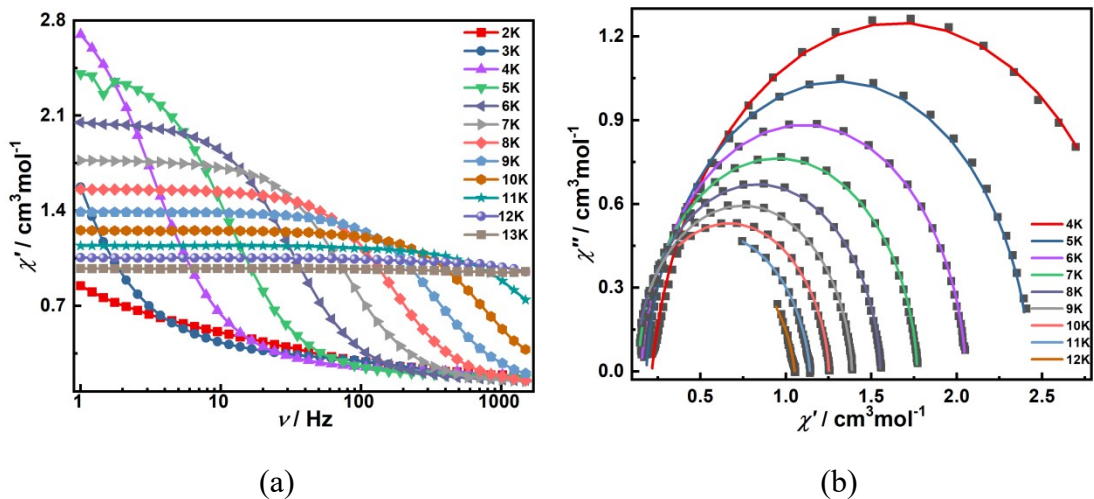

**Fig. S12** Frequency dependence of in-phase (a) ac susceptibility under a 1000Oe dc field and Cole-Cole plots (b) for **3**.

**Table S6.** Cole-Cole parameters of **3** at a 1000Oe dc field.

| $T / \text{K}$ | $\chi_S / \text{cm}^3 \text{mol}^{-1}$ | $\chi_T / \text{cm}^3 \text{mol}^{-1}$ | $\tau / \text{s}$ | $\alpha$ | $R$     |
|----------------|----------------------------------------|----------------------------------------|-------------------|----------|---------|
| 4              | 2.16E-1                                | 3.10                                   | 4.86E-2           | 9.04E-2  | 3.19E-2 |
| 5              | 1.83E-1                                | 2.43                                   | 1.36E-2           | 5.06E-2  | 2.55E-2 |
| 6              | 1.54E-1                                | 2.05                                   | 4.96E-3           | 4.55E-2  | 2.16E-3 |
| 7              | 1.33E-1                                | 1.77                                   | 2.07E-3           | 4.26E-2  | 1.23E-3 |
| 8              | 1.18E-1                                | 1.55                                   | 9.57E-4           | 4.26E-2  | 6.14E-4 |
| 9              | 1.08E-1                                | 1.39                                   | 4.62E-4           | 4.60E-2  | 5.87E-4 |
| 10             | 8.28E-2                                | 1.25                                   | 2.04E-4           | 6.12E-2  | 7.83E-4 |
| 11             | 9.89E-16                               | 1.14                                   | 7.14E-5           | 9.28E-2  | 6.75E-4 |
| 12             | 1.78E-15                               | 1.04                                   | 2.33E-5           | 1.29E-1  | 1.02E-3 |

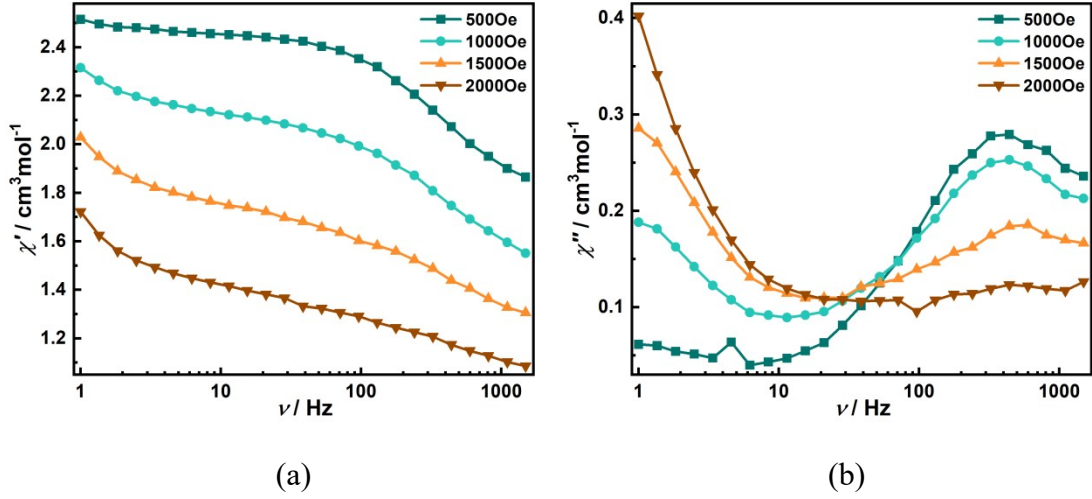

**Fig. S13** Frequency dependence of in-phase (a) and out-of-phase (b) ac susceptibility under various dc fields at 2 K for **4**.

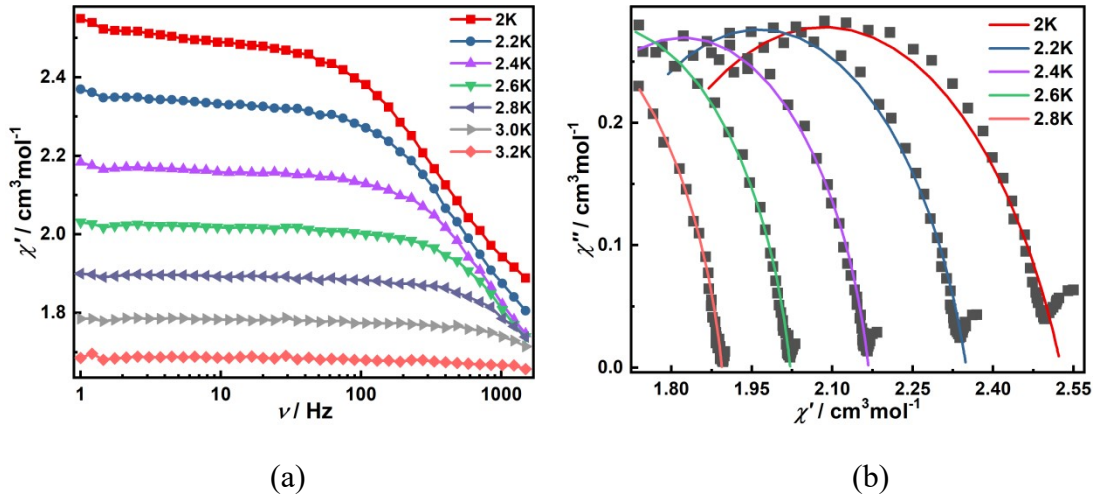

**Fig. S14** Frequency dependence of in-phase (a) ac susceptibility under a 500 Oe dc field and Cole-Cole plots (b) for **4**.

**Table S7.** Cole-Cole parameters of **4** at a 500 Oe dc field.

| $T / \text{K}$ | $\chi_S / \text{cm}^{-3}\text{mol}^{-1}$ | $\chi_T / \text{cm}^{-3}\text{mol}^{-1}$ | $\tau / \text{s}$ | $\alpha$ | $R$     |
|----------------|------------------------------------------|------------------------------------------|-------------------|----------|---------|
| 2              | 1.64                                     | 2.53                                     | 3.16E-4           | 2.84E-1  | 2.04E-2 |
| 2.2            | 1.58                                     | 2.35                                     | 2.36E-4           | 2.10E-1  | 1.02E-2 |
| 2.4            | 1.48                                     | 2.16                                     | 1.54E-4           | 1.57E-1  | 4.74E-3 |
| 2.6            | 1.32                                     | 2.02                                     | 8.22E-5           | 1.45E-1  | 2.43E-3 |
| 2.8            | 1.15                                     | 1.89                                     | 4.05E-5           | 1.44E-1  | 1.31E-3 |

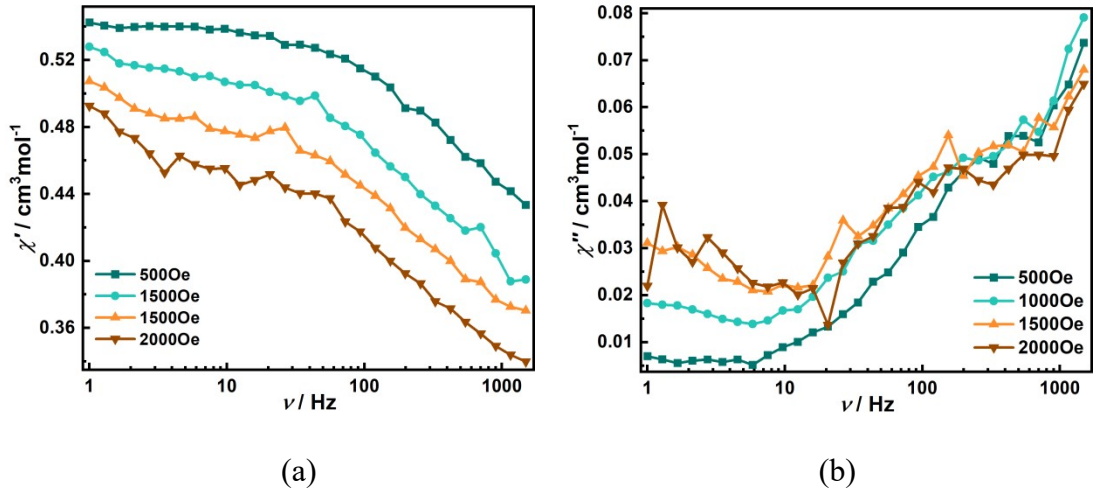

**Fig. S15** Frequency dependence of in-phase (a) and out-of-phase (b) ac susceptibility under various dc fields at 2 K for **5**.

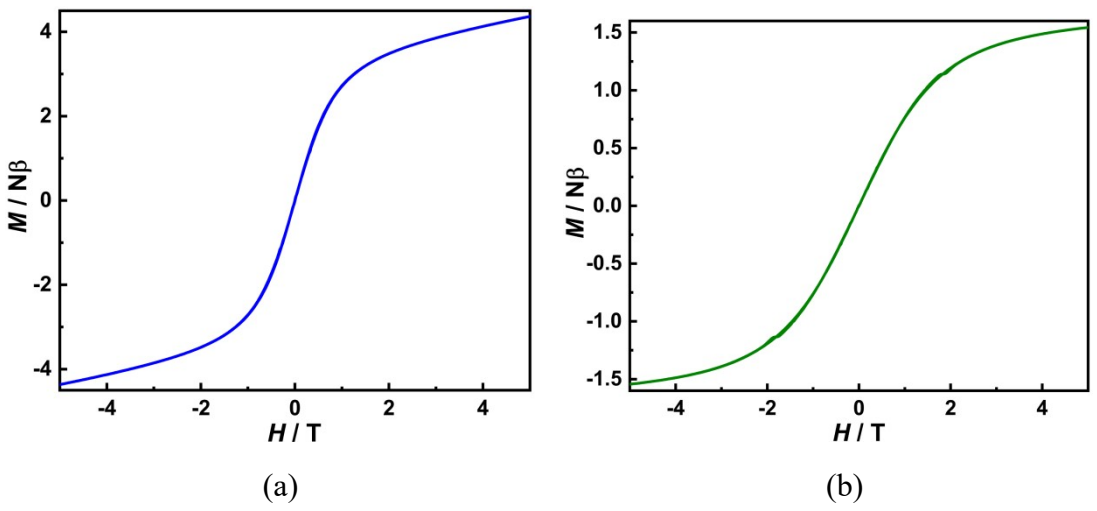

**Fig. S16** Field dependence of the magnetization at 2 K for **4** (a) and **5** (b).

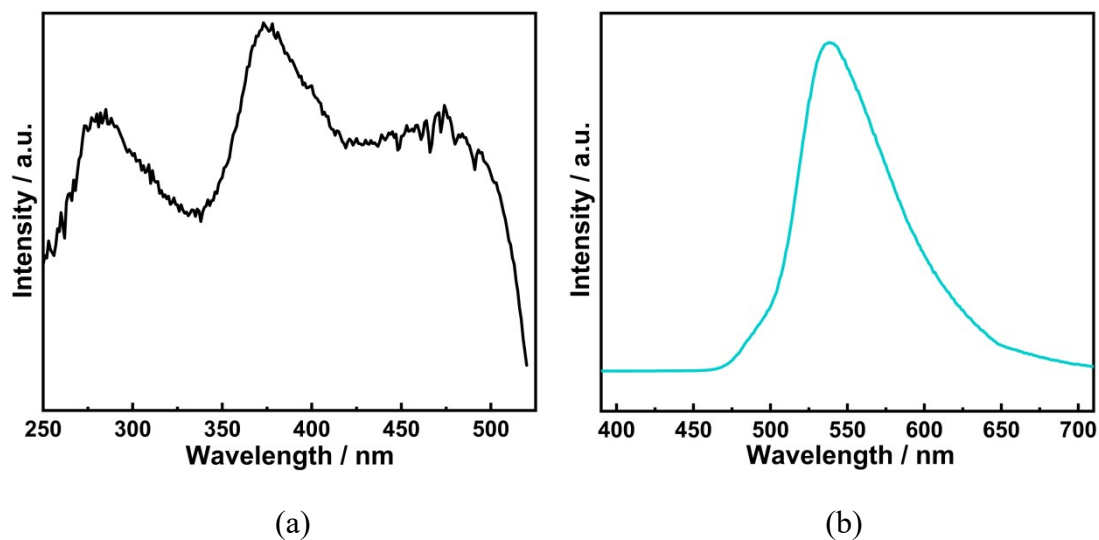

Fig. S17 Excitation (a) and emission (b) spectra of the ligand.

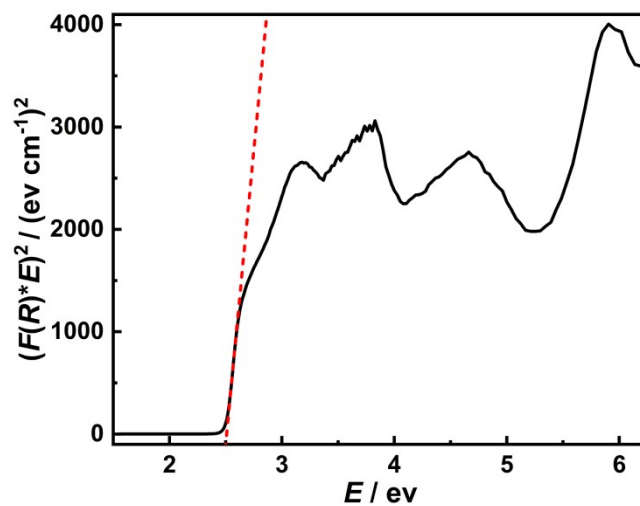

Fig. S18 Kubelka-Munk Function vs. energy curves of the ligand.

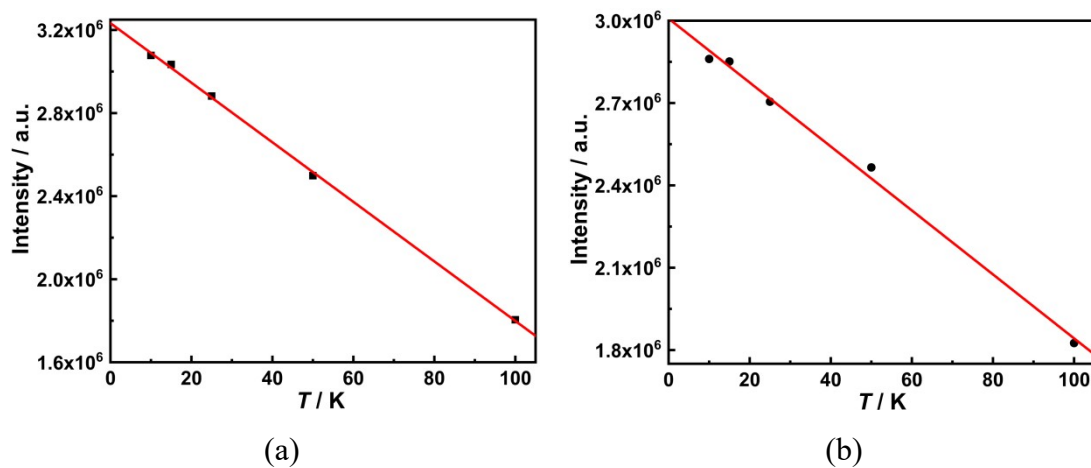

**Fig. S19** Emission intensity vs. temperature curves of **1** (a) and **2** (b) below 100K. The solid lines are the best linear fits to the data ( $R^2=0.999$  for **1** and 0.994 for **2**).

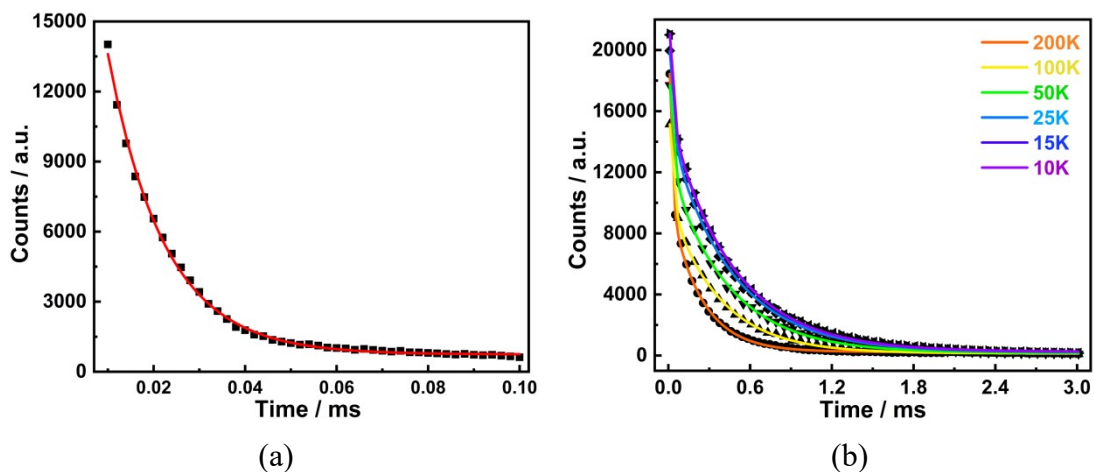

**Fig. S20** Lifetime decay curves for **2** at 300K (a) and below 200K (b). The solid lines are the best fit to the single (a) or double (b) exponential functions.

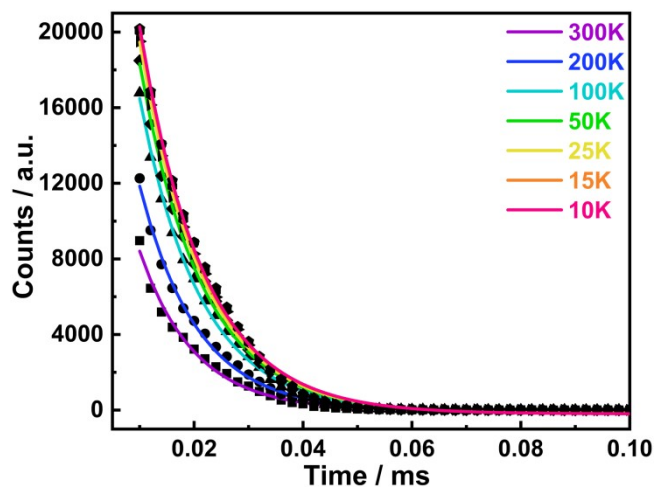

**Fig. S21** Lifetime decay curves for **1** at various temperatures. The solid lines are the best fit to the double exponential functions.



**Table S8.** The emission lifetimes of **1** and **2** measured by using the light source with pulse width of 10 $\mu$ s.

| $T / K$ | <b>1-Dy<sub>4</sub></b> | <b>2-Gd<sub>4</sub></b> |               |
|---------|-------------------------|-------------------------|---------------|
|         | $\tau / ms$             | $\tau_1 / ms$           | $\tau_2 / ms$ |
| 300     | 0.010                   | 0.012                   | -             |
| 200     | 0.011                   | 0.018                   | 0.23          |
| 100     | 0.011                   | 0.028                   | 0.37          |
| 50      | 0.011                   | 0.030                   | 0.42          |
| 25      | 0.011                   | 0.031                   | 0.45          |
| 15      | 0.012                   | 0.027                   | 0.46          |
| 10      | 0.012                   | 0.028                   | 0.46          |

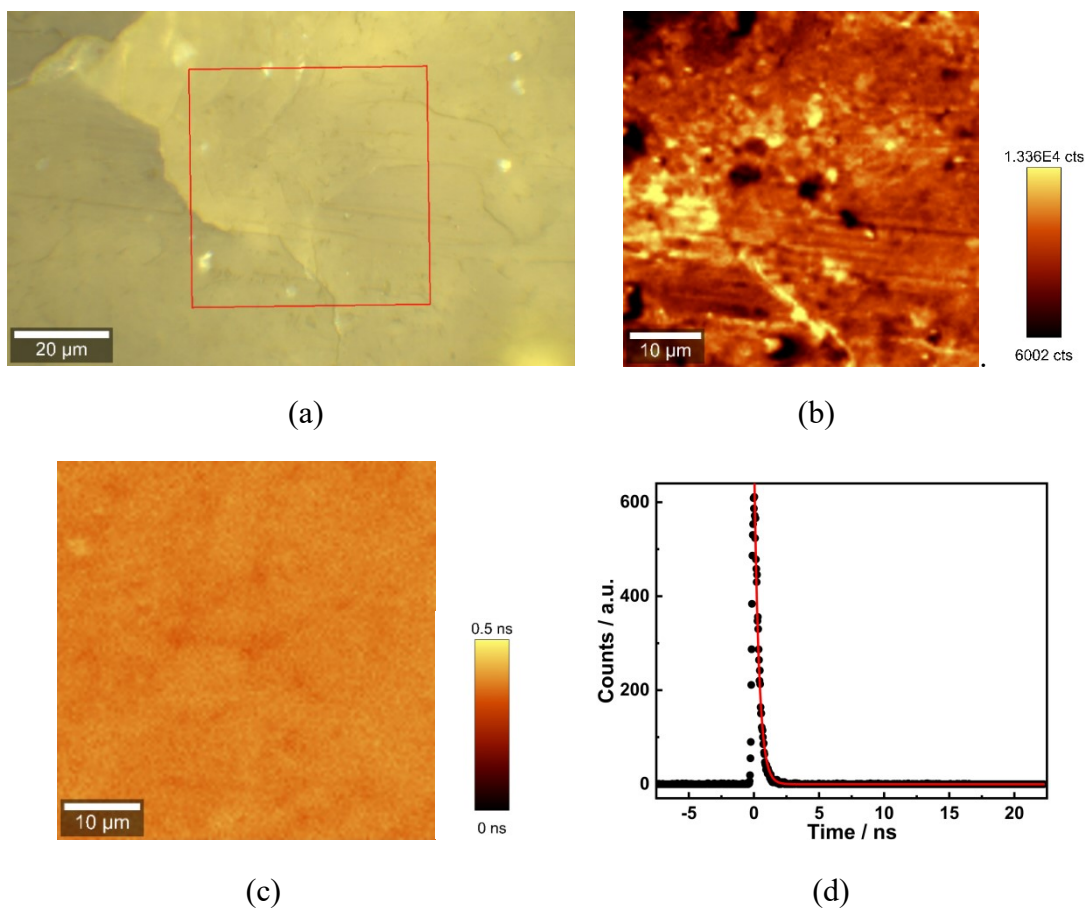

**Fig. S22** (a) Optical image of the complex **1** (the scanning range is within the red frame); (b) PL intensity mapping image of complex **1**; (c) PL lifetime mapping image of complex **1**; (d) Lifetime decay curve of **1** at 300K. The red line is the best fit to the single exponential function.

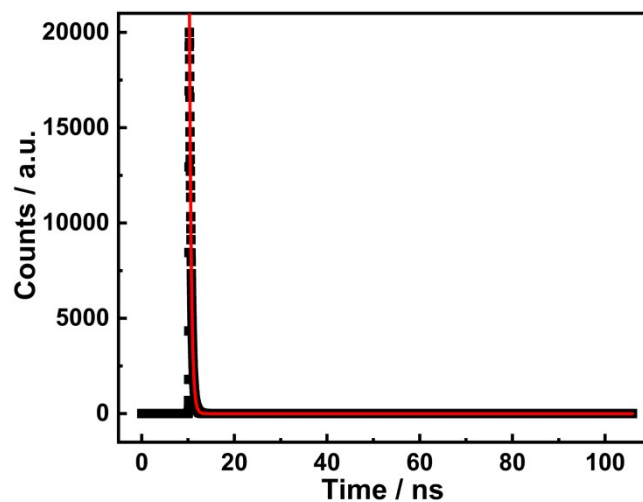

**Fig. S23** Lifetime decay curve of the ligand at 300K. The red line is the best fit to the single exponential function.

**Table S9.** Images of **3** and **6** under day light and UV light.

| Compound      | Under day light                                                                     | Under UV light                                                                       |
|---------------|-------------------------------------------------------------------------------------|--------------------------------------------------------------------------------------|
| <b>3-DyZn</b> | 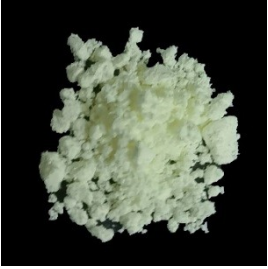 |  |
| <b>6-LuZn</b> |  |  |

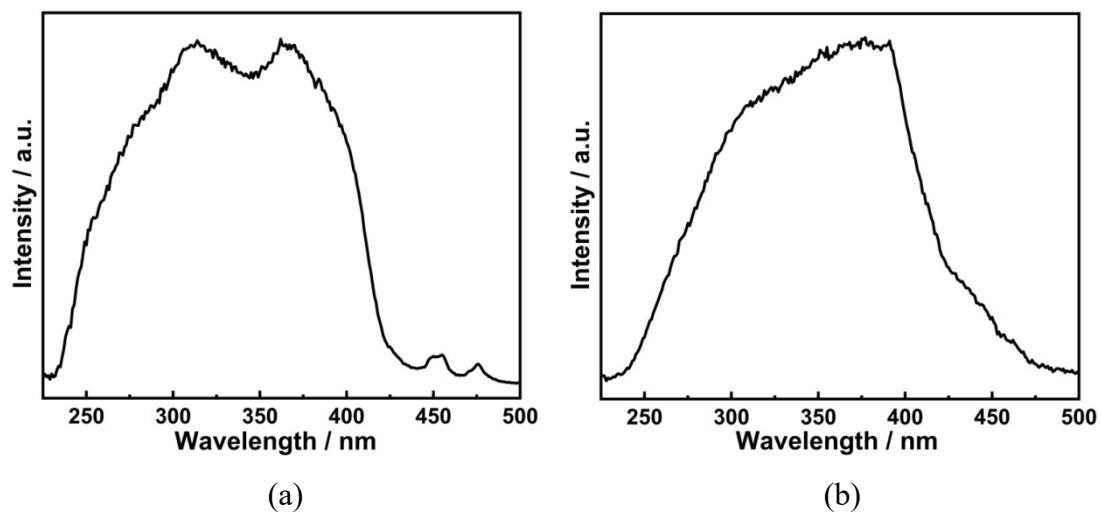

Fig. S24 Excitation spectra of **3** (a) and **5** (b).

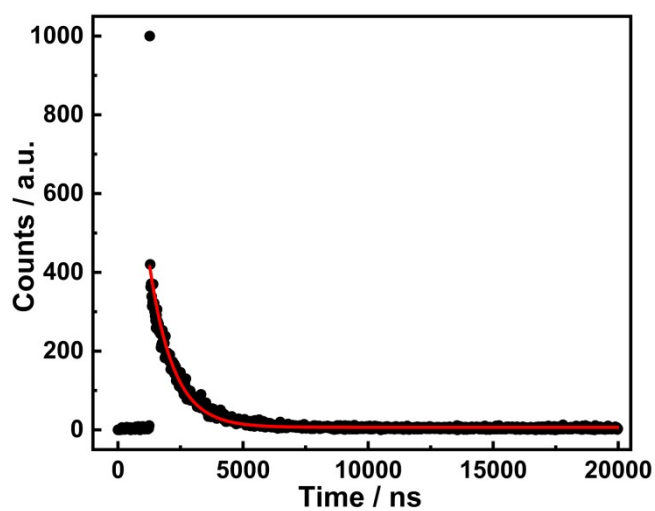

Fig. S25 Lifetime decay curve of **3** at 300K. The red line is the best fit to the single exponential function.

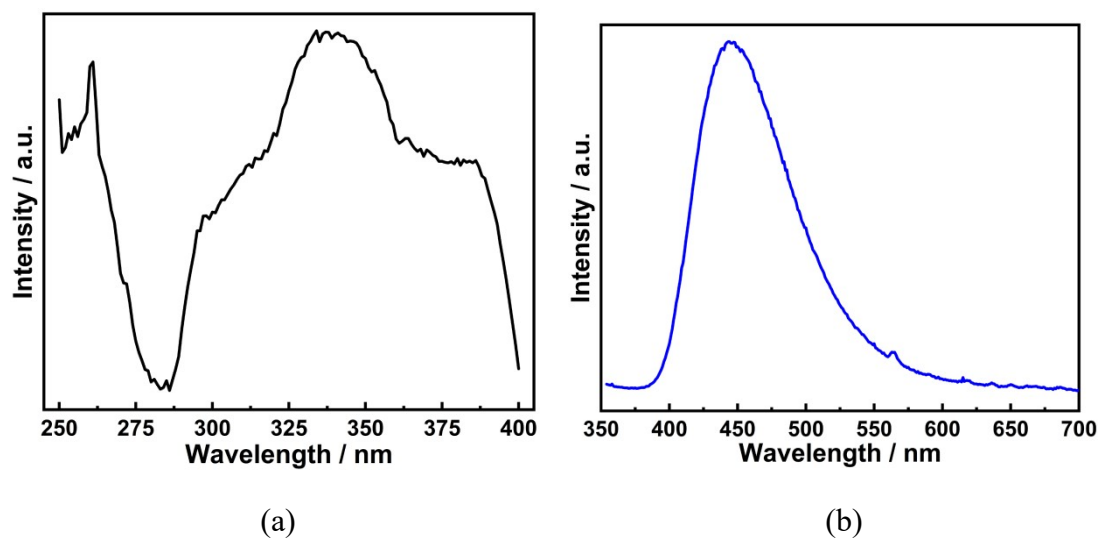

**Fig. S26** Excitation and emission spectra of **6** at 300K.

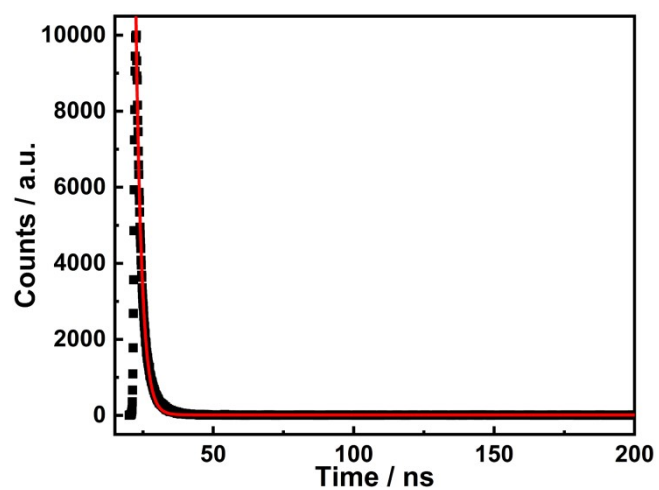

**Fig. S27** Lifetime decay curve of **6** at 300K. The red line is the best fit to the single exponential function.

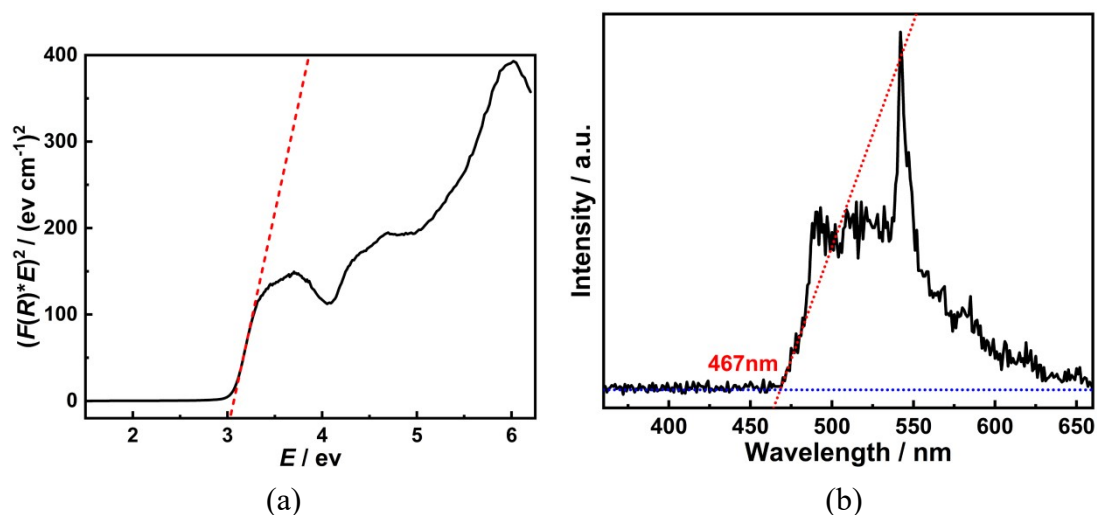

**Fig. S28** (a) Kubelka-Munk Function vs. energy curves of **6**; (b) The phosphorescence spectrum of **6** at 77K.

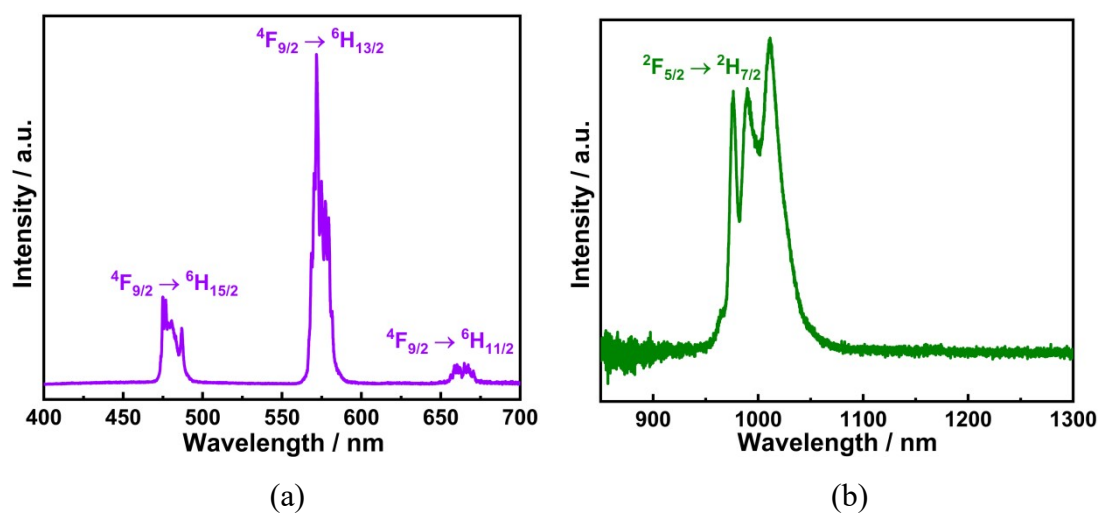

**Fig. S29** The emission spectra of **3** and **5** at 15K.

**Table S10.** The energy gaps between ground and excited states from luminescence measurements for **3** and **5**.

|    | <b>3-DyZn</b> / $\text{cm}^{-1}$ | <b>5-YbZn</b> / $\text{cm}^{-1}$ |
|----|----------------------------------|----------------------------------|
| E0 | 0                                | 0                                |
| E1 | 40.8                             | 127.6                            |
| E2 | 82.2                             | 200.7                            |
| E3 | 147.4                            | 354.5                            |
| E4 | 247.0                            |                                  |
| E5 | 370.5                            |                                  |

|    |       |  |
|----|-------|--|
| E6 | 426.1 |  |
| E8 | 516.0 |  |

### Synthesis and characterizations of the ligand

#### Synthesis of the ligand ( $H_2L$ , $H_2L = 6,6'$ -dimethoxy-2,2'-[2,2-dimethylpropane - 1,3-diylbis- (nitrilomethylidyne)]diphenol)

o-Vanillin (3.04g, 20mmol) was added to a solution of 2,2-dimethyl-1,3-propanediamine (1.02g 10mmol) in EtOH (20mL) and then the mixture was heated at reflux for 2h. After cooling to room temperature, the resulting yellow microcrystal was filtered and was recrystallized using ether to give high quality single crystals. Yield: 2.85g (77%). Calc. (%) for  $C_{21}H_{26}N_2O_4$ : C 68.09, H 7.07, N 7.56; found: C 68.24, H 7.04, N 7.55. Selected IR data ( $cm^{-1}$ ): 3321(br), 2902(w), 1638(s), 1529(w), 1475(w), 1373(w), 1256(s), 1227(m), 10798(w), 1052(w), 981(w), 915(w), 780(w), 734(m), 606(w) (Fig. S30).

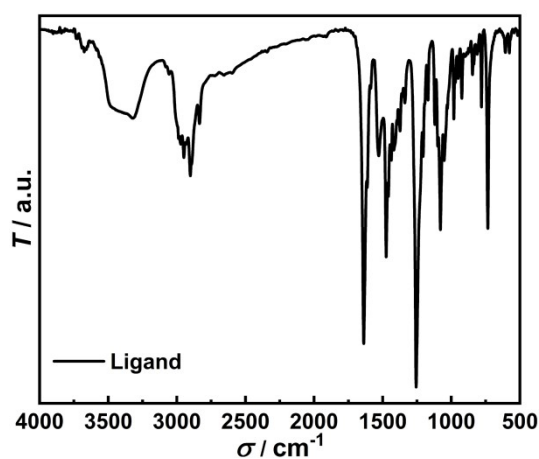

Fig. S30 IR spectra of the ligand.

Single crystal X-ray diffractions reveal that the ligand crystallizes in triclinic space group  $P-1$  with  $Z = 4$  (Table S1). The asymmetric unit is comprised of two crystallographically independent molecules (Fig. S31). Two imino groups are almost coplanar with the benzene rings. The C=N bond lengths vary from 1.277(2) to 1.304 Å and the relatively short bond length confirms their double bond nature. One phenol group in the molecule is deprotonated and acts as acceptor for the N-H $\cdots$ O hydrogen bond, whereas the other is neutral and acts as donor for the O-H $\cdots$ N hydrogen bond (Fig. S31). These intramolecular hydrogen bonds add stability to the molecules. The molecules are further linked by weak C-H $\cdots$ O/N hydrogen bonds to form a 3D supramolecular framework (Fig. S32). Powder X-ray diffractions show that the experimental PXRD patterns of the ligand are consistent with those extracted from single crystal X-ray diffraction (Fig. S33), confirming its phase purity.

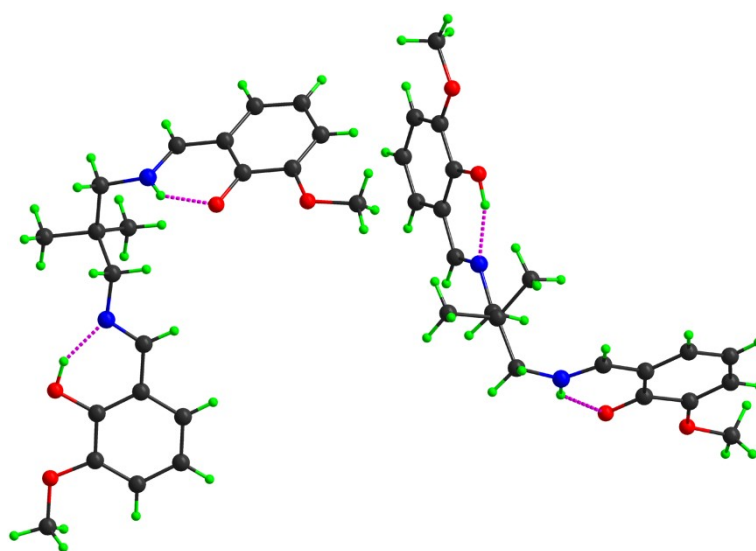

**Fig. S31** Molecular structure of the ligand. The pink dash lines represent the intramolecular hydrogen bonds.

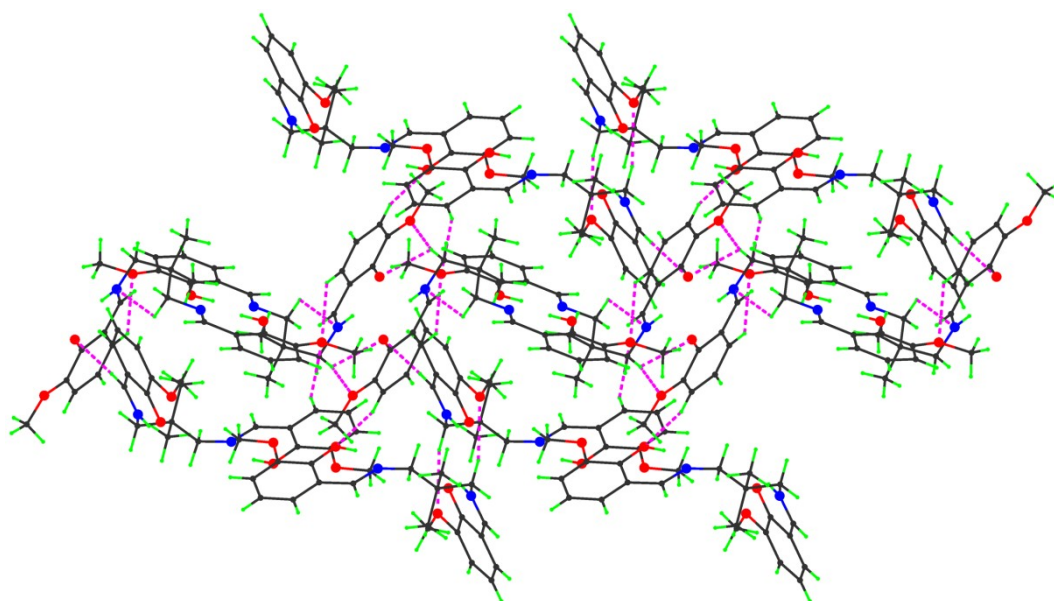

**Fig. S32** The 3D supramolecular framework of the ligand. The pink dash lines represent weak intermolecular hydrogen bonds.

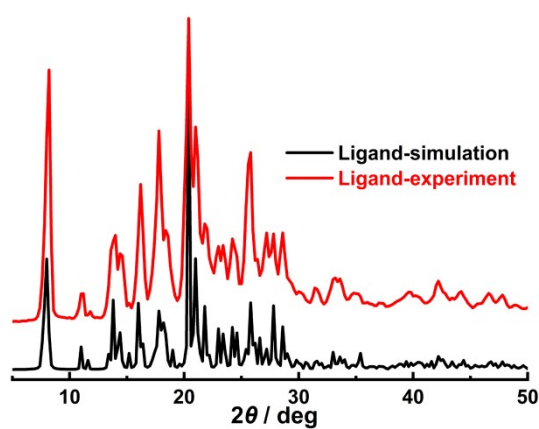

**Fig. S33** Measured and simulated PXRD patterns of the ligand.

### SQUEEZE results for 1:

# SQUEEZE RESULTS (Version = 120716)

# Note: Data are Listed for all Voids in the P1 Unit Cell

# i.e. Centre of Gravity, Solvent Accessible Volume,



# Recovered number of Electrons in the Void and

# Details about the Squeezed Material

loop\_

  \_platon\_squeeze\_void\_nr

  \_platon\_squeeze\_void\_average\_x

  \_platon\_squeeze\_void\_average\_y

  \_platon\_squeeze\_void\_average\_z

  \_platon\_squeeze\_void\_volume

  \_platon\_squeeze\_void\_count\_electrons

  \_platon\_squeeze\_void\_content

|   |       |       |        |      |        |
|---|-------|-------|--------|------|--------|
| 1 | 0.000 | 0.000 | -0.008 | 1158 | 295 '' |
| 2 | 0.500 | 0.500 | 0.543  | 1158 | 295 '' |
| 3 | 0.000 | 0.239 | 0.750  | 6    | 0 ''   |
| 4 | 0.500 | 0.261 | 0.250  | 6    | 0 ''   |
| 5 | 0.500 | 0.739 | 0.750  | 6    | 0 ''   |
| 6 | 0.000 | 0.761 | 0.250  | 6    | 0 ''   |

# Missing Reflections Below  $\sin(\theta)/\lambda = 0.25$

loop\_

  \_platon\_missing\_refl\_index\_h

  \_platon\_missing\_refl\_index\_k

  \_platon\_missing\_refl\_index\_l

  \_platon\_missing\_refl\_theta

|    |   |   |       |
|----|---|---|-------|
| 2  | 0 | 0 | 1.612 |
| 1  | 1 | 0 | 1.442 |
| -1 | 1 | 1 | 1.485 |
| 1  | 1 | 1 | 2.000 |
| 0  | 2 | 1 | 2.597 |
| -2 | 0 | 2 | 1.762 |
| 0  | 0 | 2 | 2.024 |

\_platon\_squeeze\_void\_probe\_radius 1.20

\_platon\_squeeze\_details

'A solvent mask was calculated and 147.5 electrons per molecule were found.

This is consistent with the presence of [NO3],3[C2H3N], 5[H2O] per molecule which account for 148 electrons per molecule.'

### **SQUEEZE results for 2:**

# SQUEEZE RESULTS (Version = 120716)

# Note: Data are Listed for all Voids in the P1 Unit Cell

# i.e. Centre of Gravity, Solvent Accessible Volume,

# Recovered number of Electrons in the Void and

# Details about the Squeezed Material

loop\_

\_platon\_squeeze\_void\_nr

\_platon\_squeeze\_void\_average\_x

\_platon\_squeeze\_void\_average\_y

\_platon\_squeeze\_void\_average\_z

\_platon\_squeeze\_void\_volume

\_platon\_squeeze\_void\_count\_electrons

\_platon\_squeeze\_void\_content

1 0.000 0.000 -0.007 1164 340 ''

2 0.500 0.500 0.543 1164 340 ''

# Missing Reflections Below  $\sin(\theta)/\lambda = 0.25$

loop\_

\_platon\_missing\_refl\_index\_h

\_platon\_missing\_refl\_index\_k

\_platon\_missing\_refl\_index\_l

\_platon\_missing\_refl\_theta

|    |   |   |       |
|----|---|---|-------|
| 2  | 0 | 0 | 1.609 |
| 1  | 1 | 0 | 1.442 |
| -1 | 1 | 1 | 1.484 |
| -6 | 0 | 2 | 4.074 |
| -2 | 0 | 2 | 1.753 |

\_platon\_squeeze\_void\_probe\_radius 1.20

\_platon\_squeeze\_details

'A solvent mask was calculated and 170 electrons per molecule were found.

This is consistent with the presence of [NO<sub>3</sub>], 4[C<sub>2</sub>H<sub>3</sub>N], 5[H<sub>2</sub>O] per molecule which account for 170 electrons per molecule.'
